# Supplementary material
Source: Elsevier journal article supplement (https://publikationen.ub.uni-frankfurt.de/opus4/files/54548/mmc6.xlsx)
Supplement: mmc6 [file mmc6.xlsx]

## Sheet: Figure1
	Figure 1 B
	CS 24h starved
	1-way RM ANOVA
	N=18
		Run speed
		F	P-value
	Pre vs Stim vs Post	22.12	<0.0001	***
	Post hoc analysis
	Tukey’s multiple comparisons
		q	P-value
	Pre vs. Stim	7.071	<0.0001	***
	Pre vs. Post	1.836	0.4025	ns
	Stim vs. Post	8.908	<0.0001	***
	Figure 1 C
	CS 24h starved
	1-way RM ANOVA
	N=18
		Turn
		F	P-value
	Pre vs Stim vs Post	54.51	<0.0001	***
	Post hoc analysis
	Tukey’s multiple comparisons
		q	P-value
	Pre vs. Stim	8.834	<0.0001	***
	Pre vs. Post	5.83	0.0004	***
	Stim vs. Post	14.66	<0.0001	***
	Figure 1 E
	CS 24h starved
	1-way RM ANOVA
	N=18
		Run speed
		F	P-value
	Trials	4.933	<0.0001	***
	Post hoc analysis
	Dunnett's multiple comparisons test
		q	P-value
	Trial 1 vs. Trial 2	1.505	0.5688	ns
	Trial 1 vs. Trial 3	3.558	0.0039	**
	Trial 1 vs. Trial 4	3.564	0.0038	**
	Trial 1 vs. Trial 5	3.979	0.0009	***
	Trial 1 vs. Trial 6	4.206	0.0004	***
	Trial 1 vs. Trial 7	4.767	0.0001	***
	Trial 1 vs. Trial 8	4.121	0.0005	***
	Trial 1 vs. Trial 9	4.383	0.0002	***
	Trial 1 vs. Trial 10	5.069	0.0001	***
	Figure 1 F,G,H
	CS 0h vs 24h vs 48h starvation
	2-way RM ANOVA
	N=10/10/11					Baseline
		Run speed				1-way ANOVA
		F (DFn, DFd)	P-value			F	P-value
	Interaction	F (18, 252) = 1.315	P=0.1780	ns		0.3996	0.6743	ns
	Trials	F (9, 252) = 8.085	P<0.0001	***
	Groups	F (2, 28) = 8.98	P=0.0010	***
	Subject (matching)	F (28, 252) = 9.031	P<0.0001	***
	Post hoc analysis					Post hoc analysis
	Tukey’s multiple comparisons					Tukey’s multiple comparisons
		q	P-value				q	P-value
	0h vs. 24h	5.136	0.0031	**		0h vs. 24h	1.247	0.6561	ns
	0h vs. 48h	5.282	0.0024	**		0h vs. 48h	0.8174	0.8329	ns
	24h vs. 48h	0.02592	0.9998	ns		24h vs. 48h	0.4589	0.9437	ns
	Figure 1 I,J
	CS 0h vs 24h vs 48h starvation
	2-way RM ANOVA
	N=10/10/11
		Run time
		F (DFn, DFd)	P-value
	Interaction	F (18, 252) = 0.9464	P=0.5230	ns
	Trials	F (9, 252) = 4.316	P<0.0001	****
	Groups	F (2, 28) = 7.351	P=0.0027	**
	Subject (matching)	F (28, 252) = 4.534	P<0.0001	****
	Post hoc analysis
	Tukey’s multiple comparisons
		q	P-value
	0h vs. 24h	5.26	0.0025	**
	0h vs. 48h	3.824	0.03	*
	24h vs. 48h	1.559	0.5206	ns
	Figure 1 L
	CS 0h vs 24h vs 48h starvation; closed loop
	1-way ANOVA
	N=20/18/19
		Total Run time
		F	P-value
	Starvation time	17.82	<0.0001	***
	Post hoc analysis
	Tukey’s multiple comparisons
		q	P-value
	0h vs. 24h	3.91	0.0215	*
	0h vs. 48h	8.399	<0.0001	***
	24h vs. 48h	4.663	0.0051	**
	Figure 1 M
	CS 0h vs 24h vs 48h starvation; closed loop
	1-way ANOVA
	N=20/18/19
		Average Run time
		F	P-value
	Starvation time	26.52	<0.0001	***
	Post hoc analysis
	Tukey’s multiple comparisons
		q	P-value
	0h vs. 24h	6.149	0.0002	***
	0h vs. 48h	10.2	<0.0001	***
	24h vs. 48h	3.861	0.0229	**

## Sheet: Figure S1
	Figure S1 D
	ORCO (Starved; mutant)
	2-way RM ANOVA
	N=10/10
		Run speed				Baseline
		F (DFn, DFd)	P-value			Unpaired T-test
	Interaction	F (9, 162) = 1.894	P=0.0562				t (Welch-corrected)	P-value
	Trials	F (9, 162) = 6.345	P<0.0001	***		ORCO[+/-] vs ORCO[-/-]	0.3591	0.7237	ns
	Groups	F (1, 18) = 30.12	P<0.0001	***
	Subject (matching)	F (18, 162) = 38.37	P<0.0001	***
	Figure S1 E
	CO2 (Starved)
	2-way RM ANOVA (matching both factors)
	N=10/10
		Run speed				Run speed Baseline
		F (DFn, DFd)	P-value			Paired T-test
	Interaction	F (5, 45) = 1.043	P=0.4462	ns			t (Welch-corrected)	P-value
	Trials	F (1, 9) = 7.059	0.4046	ns		Air vs CO2	0.8888	0.3972	ns
	Groups	F (5, 45) = 0.9702	P=0.0262	*
		Turn				Turn Baseline
		F (DFn, DFd)	P-value			Paired T-test
	Interaction	F (5, 45) = 0.8741	P=0.5061	ns			t (Welch-corrected)	P-value
	Trials	F (5, 45) = 1.091	P=0.3787	ns		Air vs CO2	1.382	0.2003	ns
	Groups	F (1, 9) = 14.15	P=0.0045	**

## Sheet: Figure2
	Figure 2 A,B
	MBON-γ1pedc>αβ (Starved; ShiTS)
	2-way RM ANOVA
	N=10/10					Baseline
		Run speed				Unpaired T-test
		F (DFn, DFd)	P-value				t (Welch-corrected)	P-value
	Interaction	F (9, 162) = 1.503	P=0.1510	ns		pBDPU ShiTS vs MB112C ShiTS	0.821	0.4269	ns
	Trials	F (9, 162) = 11.59	P<0.0001	***
	Groups	F (1, 18) = 9.767	P=0.0058	**
	Subject (matching)	F (18, 162) = 12.22	P<0.0001	***
	Figure 2 C,D
	MBON-γ1pedc>αβ (Starved; CsChrimson)
	2-way RM ANOVA
	N=7/7					Baseline
		Run speed				Unpaired T-test
		F (DFn, DFd)	P-value				t (Welch-corrected)	P-value
	Interaction	F (18, 243) = 1.206	P=0.2564	ns		pBDPU CsChr vs MB112C CsChr	0.6176	0.545	ns
	Trials	F (9, 243) = 13.66	P<0.0001	***
	Groups	F (2, 27) = 0.07317	P=0.9296	ns
	Subject (matching)	F (27, 243) = 19.56	P<0.0001	***
	Figure 2 E,F
	MBON-α2sc (Starved; ShiTS)
	2-way RM ANOVA
	N=10/15					Baseline
		Run speed				Unpaired T-test
		F (DFn, DFd)	P-value				t (Welch-corrected)	P-value
	Interaction	F (9, 207) = 1.29	P=0.2439	ns		pBDPU ShiTS vs MB80C ShiTS	0.02218	0.9825	ns
	Trials	F (9, 207) = 10.13	P<0.0001	***
	Groups	F (1, 23) = 11.57	P=0.0024	**
	Subject (matching)	F (23, 207) = 20.69	P<0.0001	***
	Figure 2 G,H
	MBON-α2sc (Starved; CsChrimson)
	2-way RM ANOVA					Baseline
	N=7/8					Unpaired T-test
		Run speed					t (Welch-corrected)	P-value
		F (DFn, DFd)	P-value			pBDPU CsChr vs MB80C CsChr	0.2463	0.8131	ns
	Interaction	F (9, 117) = 2.056	P=0.0390	*
	Trials	F (9, 117) = 3.203	P=0.0017	**
	Groups	F (1, 13) = 1.373	P=0.2623	ns
	Subject (matching)	F (13, 117) = 9.904	P<0.0001	***

## Sheet: FigureS2
	Figure S2 A
	MBON split-Gal4 lines (starved; ShiTS)
	Kruskal-Wallis test
	N(->ShiTS)=48
	N(split-Gal4)=4-12
		PI
		H	P-value
	Groups	65.51	<0.0001	***
	Post hoc analysis
	Dunn's multiple comparisons test
		Mean rank diff.	P-value
	->ShiTS vs. MB002B	-5.729	>0.9999	ns
	->ShiTS vs. MB011B	43.27	>0.9999	ns
	->ShiTS vs. MB057B	25.02	>0.9999	ns
	->ShiTS vs. MB074C	-10.23	>0.9999	ns
	->ShiTS vs. MB083C	44.4	>0.9999	ns
	->ShiTS vs. MB210B	53.73	0.0057	**
	->ShiTS vs. MB298B	32.4	>0.9999	ns
	->ShiTS vs. MB399B	36.02	>0.9999	ns
	->ShiTS vs. MB433B	29.52	>0.9999	ns
	->ShiTS vs. MB434B	10.02	>0.9999	ns
	->ShiTS vs. MB018B	58.15	0.3348	ns
	->ShiTS vs. MB027B	68.02	0.0953	ns
	->ShiTS vs. MB050B	77.4	0.0249	*
	->ShiTS vs. MB051B	70.27	0.07	ns
	->ShiTS vs. MB052B	70.9	0.0641	ns
	->ShiTS vs. MB080C	75.27	0.0342	*
	->ShiTS vs. MB082C	43.27	>0.9999	ns
	->ShiTS vs. MB083C	44.4	>0.9999	ns
	->ShiTS vs. MB112C	90.52	0.003	**
	->ShiTS vs. MB093C	25.4	>0.9999	ns
	->ShiTS vs. MB242A	43.9	>0.9999	ns
	->ShiTS vs. MB310C	39.27	>0.9999	ns
	->ShiTS vs. MB242A	43.9	>0.9999	ns
	->ShiTS vs. MB310C	39.27	>0.9999	ns
	->ShiTS vs. MB542B	34.4	>0.9999	ns
	->ShiTS vs. MB543B	8.771	>0.9999	ns
	->ShiTS vs. MB549C	-15.48	>0.9999	ns
	->ShiTS vs. MB552B	-2.104	>0.9999	ns
	Figure S2 B-D
	MBON-γ1pedc>αβ (fed; CsChrimson)
	2-way RM ANOVA
	N=10/10					Baseline
		Run speed				Unpaired T-test
		F (DFn, DFd)	P-value				t (Welch-corrected)	P-value
	Interaction	F (9, 108) = 1.364	P=0.2136	ns		pBDPU CsChr vs MB112C CsChr	1.557	0.1461	ns
	Trials	F (9, 108) = 2.122	P=0.0335	*
	Groups	F (1, 12) = 36.12	P<0.0001	***
	Subject (matching)	F (12, 108) = 3.848	P<0.0001	***
	Figure S2 E,F
	MBON-γ1pedc>αβ (starved; CsChrimson; light only)
	2-way RM ANOVA
	N=10/10
		Run speed				Baseline
		F (DFn, DFd)	P-value			Unpaired T-test
	Interaction	F (9, 162) = 1.691	P=0.0950	ns			t (Welch-corrected)	P-value
	Trials	F (9, 162) = 5.438	P<0.0001	***		pBDPU CsChr vs MB112C CsChr	1.434	0.1699	ns
	Groups	F (1, 18) = 1.777	P=0.1992	ns
	Subject (matching)	F (18, 162) = 13.98	P<0.0001	***
	Figure S2 F
	CS (starved; light only)
	1-way RM ANOVA
	N=10
		Run speed
		F	P-value
	Trials	2.159	0.1022	ns

## Sheet: Figure3
	Figure 3 A-E
	MB112C>GCaMP6f
	2-way RM ANOVA
	N=8/8
		Fig. 3D				Fig. 3E
		Peduncle				Gamma 1
		F (DFn, DFd)	P-value			F (DFn, DFd)	P-value
	Interaction	F (9, 126) = 1.069	0.3899	ns		F (9, 126) = 0.7513	0.6613	ns
	Trials	F (9, 126) = 13.65	<0.0001	***		F (9, 126) = 3.281	0.0013	**
	Fed vs Starved	F (1, 14) = 0.8593	0.3696	ns		F (1, 14) = 2.755	0.1192	ns
	Subject (matching)	F (14, 126) = 17.33	<0.0001	***		F (14, 126) = 6.341	<0.0001	***
	Figure 3 F-J
	MB080C>GCaMP6f (axons)
	2-way RM ANOVA P-values
	N=8/8
		Fig. 3H				Fig. 3I				Fig. 3J
		Onset Peak				Offset Peak				Offset Decay
		F (DFn, DFd)	P-value			F (DFn, DFd)	P-value			F (DFn, DFd)	P-value
	Interaction	F (9, 126) = 1.343	0.2215	ns		F (9, 126) = 0.3359	0.9615	ns		F (9, 126) = 0.4211	0.9218	ns
	Trials	F (9, 126) = 1.691	0.0977	ns		F (9, 126) = 1.4	0.1951	ns		F (9, 126) = 0.5455	0.8388	ns
	Fed vs Starved	F (1, 14) = 1.663	0.2181	ns		F (1, 14) = 4.36	0.0555	ns		F (1, 14) = 9.036	0.0094	**
	Subject (matching)	F (14, 126) = 22.49	<0.0001	***		F (14, 126) = 11.76	<0.0001	***		F (14, 126) = 2.616	0.0023	**

## Sheet: Figure4
	Figure 4 A,B
	Gr5a and Gr43a (Starved; CsChrimson)
	2-way RM ANOVA
	N=10/10/10					Baseline
		Run speed				1-way ANOVA
		F (DFn, DFd)	P-value			F	P-value
	Interaction	F (18, 243) = 3.107	P<0.0001	***		0.3194	0.7293	ns
	Trials	F (9, 243) = 8.424	P<0.0001	***
	Groups	F (2, 27) = 10.43	P=0.0004	***
	Subject (matching)	F (27, 243) = 12.73	P<0.0001	***
	Post hoc analysis					Post hoc analysis
	Tukey’s multiple comparisons					Tukey’s multiple comparisons
		q	P-value			q	P-value
	pBDPU CsChr vs. Gr5a CsChr	5.021	0.004	**		0.9439	0.7841	ns
	pBDPU CsChr vs. Gr43a CsChr	6.029	0.0006	***		0.06651	0.9988	ns
	Gr5a CsChr vs. Gr43a CsChr	1.008	0.7583	ns		1.01	0.7571	ns
	Figure 4 C
	Gr5a and Gr43a (Starved; CsChrimson)
	Unpaired t-test
	N=10/10
		Acceleration
		Basal
		t (Welch-corrected)	P-value
	Gr5a CsChr vs. Gr43a CsChr	4.003	0.0011	**
	Figure 4 D,E
	CS re-feeding
	2-way RM ANOVA
	N=16/16
		Fig. 1G
		Run speed
		F (DFn, DFd)	P-value
	Interaction	F (9, 270) = 1.616	0.1105	ns
	Trials	F (9, 270) = 14.44	<0.0001	***
	Groups	F (1, 30) = 5.966	0.0207	*
	Subject (matching)	F (30, 270) = 16.33	<0.0001	***

## Sheet: Figure5
	Figure 5 A,B
	Tdc2 (Starved; CsChrimson)
	2-way RM ANOVA
	N=10/10/10					Baseline
		Run speed				1-way ANOVA
		F (DFn, DFd)	P-value			F	P-value
	Interaction	F (18, 243) = 7.411	P<0.0001	***		1.465	0.2489	ns
	Trials	F (9, 243) = 20.37	P<0.0001	***
	Groups	F (2, 27) = 27.05	P<0.0001	***
	Subject (matching)	F (27, 243) = 21.84	P<0.0001	***
	Post hoc analysis					Post hoc analysis
	Tukey’s multiple comparisons					Tukey’s multiple comparisons
		q	P-value			q	P-value
	UAS Ctrl vs. Gal4 Ctrl	0.1854	0.9906	ns		2.015	0.3427	ns
	UAS Ctrl vs. Tdc2 CsChr	9.099	<0.0001	***		2.169	0.2914	ns
	Gal4 Ctrl vs. Tdc2 CsChr	8.913	<0.0001	***		0.1545	0.9934	ns
	Figure 5 C,D
	MB22B and MB113C (Starved; CsChrimson)
	2-way RM ANOVA
	N=10/10/10					Baseline
		Run speed				1-way ANOVA
		F (DFn, DFd)	P-value			F	P-value
	Interaction	F (18, 243) = 1.013	P=0.4458	ns		1.922	0.1658	ns
	Trials	F (9, 243) = 4.27	P<0.0001	***
	Groups	F (2, 27) = 10.37	P=0.0005	***
	Subject (matching)	F (27, 243) = 10.88	P<0.0001	***
	Post hoc analysis					Post hoc analysis
	Tukey’s multiple comparisons					Tukey’s multiple comparisons
		q	P-value			q	P-value
	pBDPU CsChr vs. MB22B CsChr	5.667	0.0012	**		1.273	0.6451	ns
	pBDPU CsChr vs. MB113C CsChr	5.483	0.0017	**		1.497	0.5472	ns
	MB22B CsChr vs. MB113C CsChr	0.1836	0.9908	ns		2.77	0.142	ns
	Figure 5 E,F
	MB22B and MB113C (Starved; CsChrimson)
	1-way ANOVA
	N=9/11/8
		PI
		F (DFn, DFd)	P-value
	Groups	F (2, 25) = 8.33	P=0.0017	**
	Post hoc analysis
	Tukey’s multiple comparisons
		q	P-value
	pBDPU CsChr vs. MB22B CsChr	5.617	0.0015	**
	pBDPU CsChr vs. MB113C CsChr	4.002	0.0237	*
	MB22B CsChr vs. MB113C CsChr	1.249	0.6559	ns

## Sheet: Figure S5
	Figure S5 A,B
	Tdc2 (Starved; CsChrimson)
	1-way ANOVA
	N=16/16/16
		PI
		F (DFn, DFd)	P-value
	Groups	F (2, 45) = 10.93	P=0.0001	***
	Post hoc analysis
	Tukey’s multiple comparisons
		q	P-value
	UAS Ctrl vs. Gal4 Ctrl	5.076	0.0023	**
	UAS Ctrl vs. Tdc2 CsChr	6.207	0.0002	***
	Gal4 Ctrl vs. Tdc2 CsChr	1.13	0.7053	ns
	Figure S5 C,D
	MB22B and MB113C (Starved; CsChrimson; odor only)
	2-way RM ANOVA
	N=6/6/6
		Run speed				Baseline
		F (DFn, DFd)	P-value			1-way ANOVA
	Interaction	F (18, 135) = 1.301	P=0.1970	ns		F	P-value
	Trials	F (9, 135) = 8.144	P<0.0001	***		0.9341	0.4143	ns
	Groups	F (2, 15) = 0.4463	P=0.6482	ns
	Subject (matching)	F (15, 135) = 9.305	P<0.0001	***
	Figure S5 E,F
	MB22B and MB113C (Starved; ShiTS)
	2-way RM ANOVA
	N=7/8/8
		Run speed				Baseline
		F (DFn, DFd)	P-value			1-way ANOVA
	Interaction	F (18, 180) = 1.384	P=0.1441	ns		F	P-value
	Trials	F (9, 180) = 18.22	P<0.0001	***		3.066	0.069	ns
	Groups	F (2, 20) = 1.187	P=0.3257	ns
	Subject (matching)	F (20, 180) = 14.9	P<0.0001	***
	Figure S5 G,H
	MB22B and MB113C (Fed; ShiTS)
	2-way RM ANOVA
	N=10/10/10
		Run speed				Baseline
		F (DFn, DFd)	P-value			1-way ANOVA
	Interaction	F (18, 243) = 1.055	P=0.3990	ns		F	P-value
	Trials	F (9, 243) = 4.195	P<0.0001	***		0
	Groups	F (2, 27) = 0.3143	P=0.7330	ns		28888	0.7515	ns
	Subject (matching)	F (27, 243) = 11.14	P<0.0001	***

## Sheet: Figure6
	Figure 6 D-F
	MB112C>GCaMP6f
	Unpaired t-test
		N=5/5			N=8/8
		Fig. 7E			Fig. 7F
		Basal			Odor response
		t (Welch-corrected)	P-value		t	P-value
	VPM4>P2X2 vs - >P2X2	3.636	0.0168	*	2.163	0.0487	*
	Figure 6 G,H
	MB112C and MB113C (fed; CsChrimson)
	2-way RM ANOVA
	N=7/7/8					Baseline
		Run speed				1-way ANOVA
		F (DFn, DFd)	P-value			F	P-value
	Interaction	F (18, 171) = 3.217	P<0.0001	***		1.272	0.303	ns
	Trials	F (9, 171) = 9.291	P<0.0001	***
	Groups	F (2, 19) = 25.92	P<0.0001	***
	Subject (matching)	F (19, 171) = 11.47	P<0.0001	***
	Post hoc analysis					Post hoc analysis
	Tukey’s multiple comparisons					Tukey’s multiple comparisons
		q	P-value			q	P-value
	MB112C CsChr vs. MB113C CsChr	8.215	<0.0001	***		2.247	0.2744	ns
	MB112C CsChr vs. MB112C MB113C CsChr	9.395	<0.0001	***		0.9916	0.7657	ns
						1.223	0.6683	ns

## Sheet: Figure S6
	Figure S6 E,F
	MB112C and MB113C (Starved; CsChrimson)
	2-way RM ANOVA
	N=6/7/8
		Run speed
		F (DFn, DFd)	P-value			Baseline
		Run speed				1-way ANOVA
		F (DFn, DFd)	P-value			F	P-value
	Interaction	F (18, 162) = 1.596	P=0.0665	ns		3.495	0.0522	ns
	Trials	F (9, 162) = 8.041	P<0.0001	***
	Groups	F (2, 18) = 12.33	P=0.0004	***
	Subject (matching)	F (18, 162) = 25.79	P<0.0001	***
						Post hoc analysis
	Post hoc analysis					Tukey’s multiple comparisons
	Tukey’s multiple comparisons
		q	P-value			q	P-value
	MB112C CsChr vs. MB113C CsChr	6.194	0.001	**		2.892	0.1302	ns
	MB112C CsChr vs. MB112C MB113C CsChr	6.191	0.001	**		3.576	0.0524	ns
	MB113C CsChr vs. MB112C MB113C CsChr	0.1982	0.9892	ns		0.8263	0.8301	ns

[truncated: 3 more sheets: Figure7, Figure S7, TrialToTrial]
